# Supplementary material for: Junk Food Marketing on Instagram: Content Analysis
Source: PubMed Central journal article supplement (PMC6008515; doi:10.2196/publichealth.9594), 2018-06-05
Supplement: publichealth_v4i2e54_app1.pdf [file publichealth_v4i2e54_app1.pdf]

Multimedia Appendix 1: All coded data for marketing strategies used by brands on Instagram

| Account name                  | Primary marketing strategy (n) |                     |          |             |                       |               |                    |                   |                 |       |       |            |       |             |                    | Other post content      |                    |                   |
|-------------------------------|--------------------------------|---------------------|----------|-------------|-----------------------|---------------|--------------------|-------------------|-----------------|-------|-------|------------|-------|-------------|--------------------|-------------------------|--------------------|-------------------|
|                               | Competitions                   | Special price promo | Vouchers | Celebrities | Children's characters | Sports people | Branded characters | Branding elements | Product imagery | Image | Video | Engagement | Links | Sponsorship | CSR / philanthropy | Informational posts (%) | Original posts (%) | Healthy posts (n) |
| <b>Grocery store foods</b>    |                                |                     |          |             |                       |               |                    |                   |                 |       |       |            |       |             |                    |                         |                    |                   |
| Ben and Jerrys<br>(295 posts) | 13                             | 0                   | 0        | 16          | 0                     | 0             | 0                  | 123               | 15              | 1     | 16    | 1          | 66    | 6           | 38                 | 85                      | 86                 | 1                 |
| Nutella<br>(226 posts)        | 3                              | 2                   | 0        | 0           | 0                     | 0             | 0                  | 152               | 65              | 0     | 1     | 3          | 0     | 0           | 0                  | 97                      | 96                 | 0                 |
| Oreo<br>(94 posts)            | 1                              | 1                   | 0        | 0           | 0                     | 0             | 0                  | 23                | 48              | 1     | 11    | 1          | 8     | 0           | 0                  | 86                      | 97                 | 0                 |
| <b>Soft drinks</b>            |                                |                     |          |             |                       |               |                    |                   |                 |       |       |            |       |             |                    |                         |                    |                   |
| Coca-Cola<br>(117 posts)      | 1                              | 0                   | 0        | 0           | 17                    | 0             | 0                  | 51                | 6               | 0     | 34    | 4          | 2     | 0           | 2                  | 60                      | 79                 | 1                 |
| Pepsi<br>(136 posts)          | 19                             | 0                   | 0        | 1           | 0                     | 0             | 0                  | 88                | 0               | 1     | 19    | 0          | 1     | 6           | 1                  | 62                      | 91                 | 0                 |
| <b>Energy drinks</b>          |                                |                     |          |             |                       |               |                    |                   |                 |       |       |            |       |             |                    |                         |                    |                   |

|                                  |   |    |   |    |   |     |    |     |     |    |    |   |    |    |    |    |     |   |
|----------------------------------|---|----|---|----|---|-----|----|-----|-----|----|----|---|----|----|----|----|-----|---|
| Gatorade<br>(226 posts)          | 0 | 0  | 0 | 0  | 0 | 124 | 0  | 77  | 2   | 12 | 8  | 0 | 2  | 0  | 1  | 43 | 100 | 9 |
| Monster<br>Energy<br>(685 posts) | 0 | 0  | 0 | 2  | 0 | 552 | 59 | 28  | 0   | 13 | 11 | 1 | 18 | 1  | 0  | 3  | 99  | 3 |
| Red Bull<br>(419 posts)          | 7 | 0  | 0 | 10 | 4 | 310 | 0  | 31  | 0   | 3  | 25 | 4 | 3  | 12 | 10 | 4  | 99  | 0 |
| <b>Fast food chains</b>          |   |    |   |    |   |     |    |     |     |    |    |   |    |    |    |    |     |   |
| Burger<br>King<br>(186 posts)    | 1 | 4  | 0 | 1  | 0 | 0   | 2  | 99  | 59  | 0  | 3  | 0 | 0  | 17 | 0  | 91 | 89  | 0 |
| Dominos<br>(407 posts)           | 7 | 0  | 1 | 0  | 0 | 3   | 0  | 101 | 232 | 33 | 14 | 4 | 7  | 2  | 3  | 74 | 100 | 4 |
| KFC<br>(160 posts)               | 1 | 0  | 0 | 0  | 0 | 4   | 26 | 45  | 16  | 21 | 22 | 0 | 5  | 18 | 2  | 57 | 100 | 0 |
| McDonalds<br>(128 posts)         | 0 | 0  | 0 | 0  | 0 | 1   | 0  | 56  | 35  | 11 | 22 | 2 | 0  | 1  | 0  | 84 | 93  | 0 |
| Starbucks<br>(312 posts)         | 9 | 16 | 0 | 0  | 0 | 0   | 0  | 175 | 67  | 3  | 4  | 4 | 26 | 1  | 7  | 78 | 73  | 2 |
| Subway                           | 0 | 6  | 0 | 1  | 0 | 1   | 0  | 50  | 29  | 5  | 3  | 2 | 0  | 1  | 0  | 71 | 99  | 2 |

|                          |   |    |   |   |   |   |   |    |    |   |   |   |   |   |   |    |    |   |
|--------------------------|---|----|---|---|---|---|---|----|----|---|---|---|---|---|---|----|----|---|
| (98 posts)               |   |    |   |   |   |   |   |    |    |   |   |   |   |   |   |    |    |   |
| Taco Bell<br>(183 posts) | 4 | 11 | 0 | 1 | 0 | 0 | 0 | 88 | 45 | 1 | 4 | 6 | 9 | 7 | 7 | 77 | 99 | 1 |
